# Supplementary material
Source: HighWire-hosted journal article supplement (https://bmjopen.bmj.com/content/13/6/e071262)
Supplement: inline-supplementary-material-1 [file inline-supplementary-material-1.pdf]

## SUPPLEMENTARY MATERIALS 1: SEARCH STRATEGY FOR EACH DATABASE

### 1.EBSCO (Medline, APA Psychinfo, CINAHL, Communication Source)

Paediatric **OR** paediatrics **OR** children **OR** child **OR** infant **OR** infants **OR** schoolchild **OR** schoolchildren **OR** preschool **OR** "early years" **OR** kindergarten (AB)

**NOT**

Teenage **OR** teenagers **OR** adolescent **OR** adolescents (SU)

**AND**

Therapy **OR** intervention **OR** interventions **OR** treatment **OR** treatments **OR** programme **OR** programmes **OR** program **OR** programs **OR** teaching **OR** instruction **OR** approach **OR** approaches **OR** technique **OR** techniques **OR** strategy **OR** strategies **OR** activity **OR** activities **OR** class **OR** classes (AB)

**AND**

"language delay" **OR** "language disorder" **OR** "specific language impairment" **OR** "language impairment" **OR** "language difficulties" **OR** "developmental language disorder" **OR** "late talker" **OR** "speech delay" **OR** "speech disorder" **OR** "speech sound disorder" **OR** "speech intelligibility" **OR** "intelligible speech" **OR** "speech comprehensibility" **OR** "comprehensible speech" (AB)

**NOT**

"sign language" **OR** "mental retardation" **OR** autism **OR** "autistic spectrum disorder" **OR** Asperger **OR** "cleft lip" **OR** "cleft palate" **OR** deaf **OR** "cerebral palsy" **OR** aphonia **OR** geriatrics **OR** "down syndrome" **OR** "cochlear implant" **OR** "autistic spectrum disorder" **OR** "autistic spectrum disorders" **OR** "autism disorder" **OR** "autistic disorder" (SU)

Limiters: 2012-current

### 2.Ovid (Emcare)

Paediatric **OR** paediatrics **OR** children **OR** child **OR** infant **OR** infants **OR** schoolchild **OR** schoolchildren **OR** preschool **OR** "early years" **OR** kindergarten (AB)

**NOT**

Teenage **OR** teenagers **OR** adolescent **OR** adolescents (SH)

**AND**

Therapy **OR** intervention **OR** interventions **OR** treatment **OR** treatments **OR** programme **OR** programmes **OR** program **OR** programs **OR** teaching **OR** instruction **OR** approach **OR** approaches **OR** technique **OR** techniques **OR** strategy **OR** strategies **OR** activity **OR** activities **OR** class **OR** classes (AB)

**AND**

“language delay” OR “language disorder” OR “specific language impairment” OR “language impairment” OR “language difficulties” OR “developmental language disorder” OR “late talker” OR “speech delay” OR “speech disorder” OR “speech sound disorder” OR “speech intelligibility” OR “intelligible speech” OR “speech comprehensibility” OR “comprehensible speech” (AB)

**NOT**

“sign language” OR “mental retardation” OR autism OR “autistic spectrum disorder” OR Asperger OR “cleft lip” OR “cleft palate” OR deaf OR “cerebral palsy” OR aphonia OR geriatrics OR “down syndrome” OR “cochlear implant” OR “autistic spectrum disorder” OR “autistic spectrum disorders” OR “autism disorder” OR “autistic disorder” (SH)

Limiters: 2012-current

**3.ERIC (descriptor terms)**

"speech impairments" OR "language impairments" OR intelligibility OR "expressive language" AND "speech language pathology" OR "speech therapy" AND "young child" OR "preschool children" OR toddlers OR "early childhood education"

Limiters: peer reviewed only

Pre-2012 studies to be removed manually following the search, within Refworks
